# Supplementary material for: Ras-activated RSK1 phosphorylates EBP50 to regulate its nuclear localization and promote cell proliferation
Source: PubMed Central journal article supplement (PMC4891120; doi:10.18632/oncotarget.7184), 2016-02-03
Supplement: oncotarget-07-10283-s001.pdf [file oncotarget-07-10283-s001.pdf]

# Ras-activated RSK1 phosphorylates EBP50 to regulate its nuclear localization and promote cell proliferation

## Supplementary Material

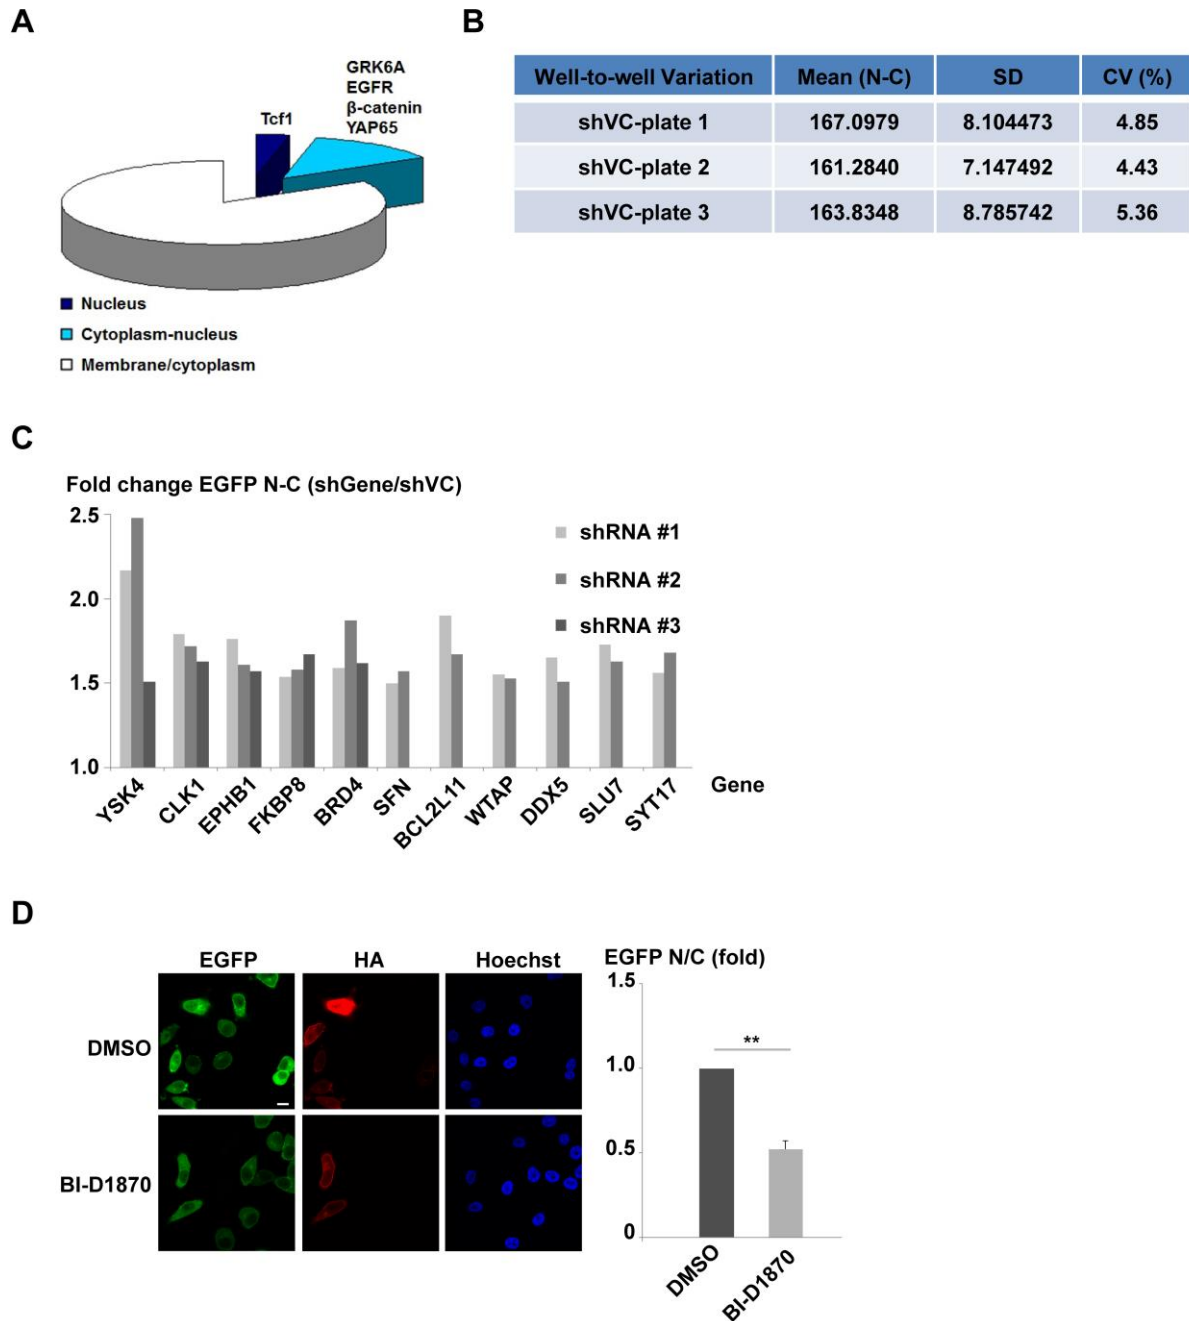

**Figure S1: A RNAi screening aimed for genes regulating the nucleocytoplasmic shuttling of EBP50.** (A) Literature-based classification of interacting partners of EBP50 according to their subcellular localization. (B) HeLa-EGFP-EBP50 cells that plated in 96-well plates were infected with control lentivirus (shVC), and the mean of N-C difference of the EGFP signal across a plate

was measured as described in the methodology section. The standard deviation (SD) and the coefficient of variation (CV) were calculated with Excel 2010. (C) The candidate genes in which its depletion enhanced nuclear accumulation of EBP50. (D) HeLa-EGFP-EBP50 cells transiently expressing HA-RasV12 were treated with dimethyl sulfoxide (DMSO) or BI-D1870 (10  $\mu$ M) for 30 min, stained with anti-HA antibody, and N/C ratio of the EGFP signal was measured within the cells expressing HA-RasV12. Hoechst 33342 was used to label nuclear DNA. Scale bar: 10  $\mu$ m. Data are means  $\pm$  SEM of > 30 cells. \*\*  $p < 0.01$ , Student's  $t$ -test.

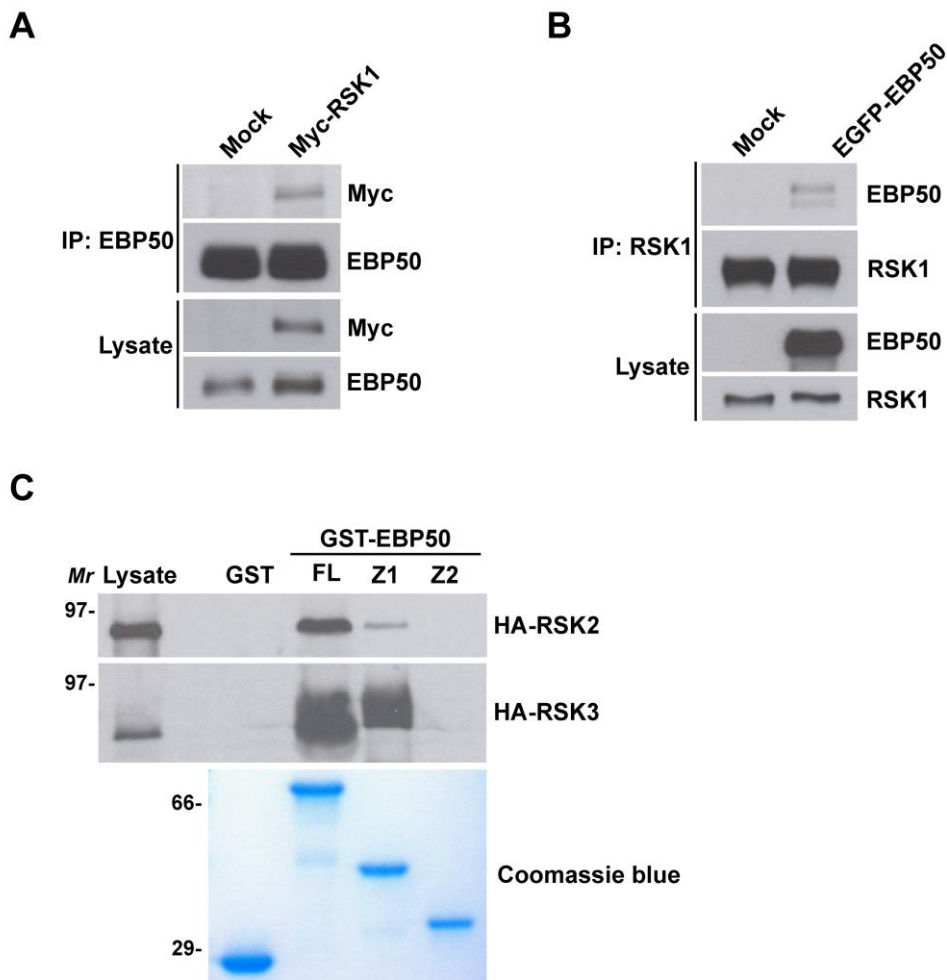

**Figure S2: EBP50 interacted with the RSK family of kinases.** (A) The cellular lysates from HeLa cells that were transfected with Myc-RSK1 or the empty vector were immunoprecipitated with EBP50 antibody and the co-immunoprecipitated RSK1 was analyzed by Western blotting using anti-Myc antibody. (B) HeLa cells were transfected with EGFP-EBP50 or an empty vector. Then, endogenous RSK1 was immunoprecipitated from the cell lysates and the immunoprecipitated materials were analyzed by Western blotting using anti-EBP50 antibody. (C) Cell lysates from HEK293 cells transiently expressing HA-tagged RSK2 or RSK3 were subjected for *in vitro* pull-down assay with GST-fused full-length (FL), first PDZ domain (Z1) or second PDZ domain (Z2) of EBP50. The pulled down materials were separated by SDS-PAGE and analyzed by Western blotting using anti-HA antibody. The coomassie blue-stained gel showed the expression and comparable loading of each recombinant protein used in the assay. Molecular marker (*Mr*): kDa.

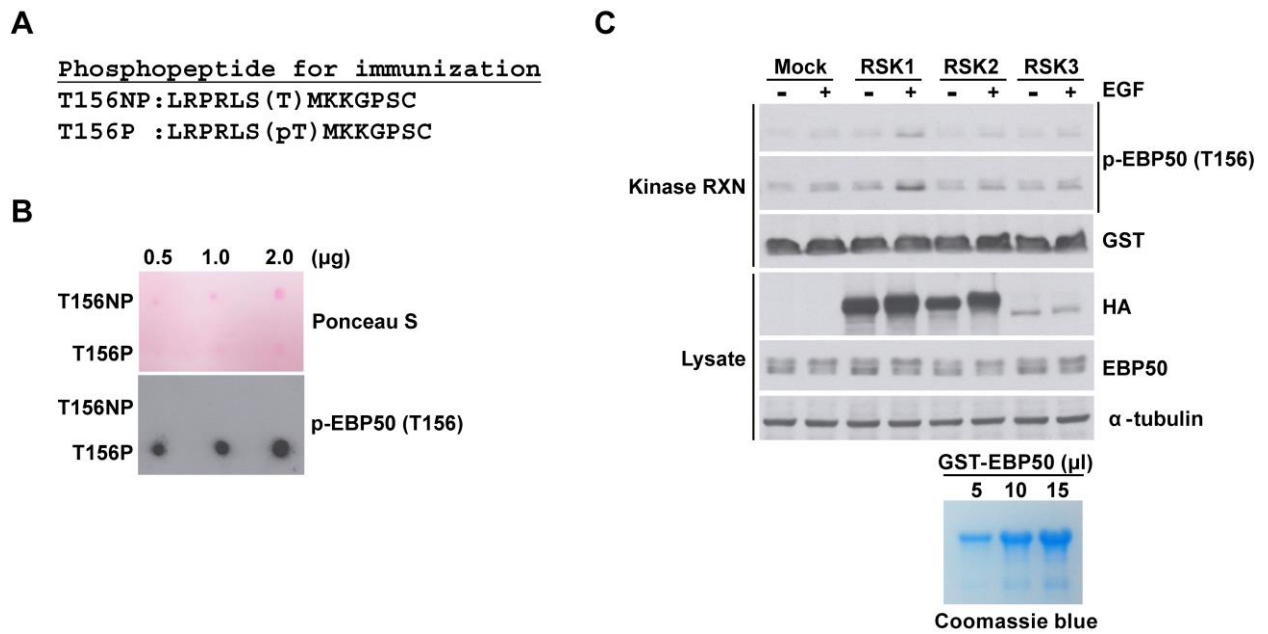

**Figure S3: Generation and analysis of anti-phospho-EBP50 (T156) antibody.** (A) The amino acids sequence of synthetic phosphopeptide (T156P) used to generate site and phosphorylation state-specific antibody for EBP50. A control peptide (T156NP) was also synthesized in which T156 was not phosphorylated. (B) Dot blot analysis to assess the production of a phospho-specific antibody, p-EBP50 (T156), for application in studies on phosphorylation of EBP50 at T156. (C) *In vitro* kinase assays were performed similarly to what was described in Figure 3D. In brief, HEK293 cells were transfected with HA-tagged RSK1, RSK2, RSK3, or an empty vector, serum starved, and stimulated with EGF (50 ng/ml) for 15 min. The immunoprecipitated RSKs was incubated with 5  $\mu$ l purified GST-EBP50, as shown by the coomassie blue stained gel, and phosphorylation of EBP50 after 30 min of kinase reaction at 37°C was analyzed by immunoblotting using phospho-T156 antibody, p-EBP50 (T156), as shown by two images that were obtained at different film exposure times.

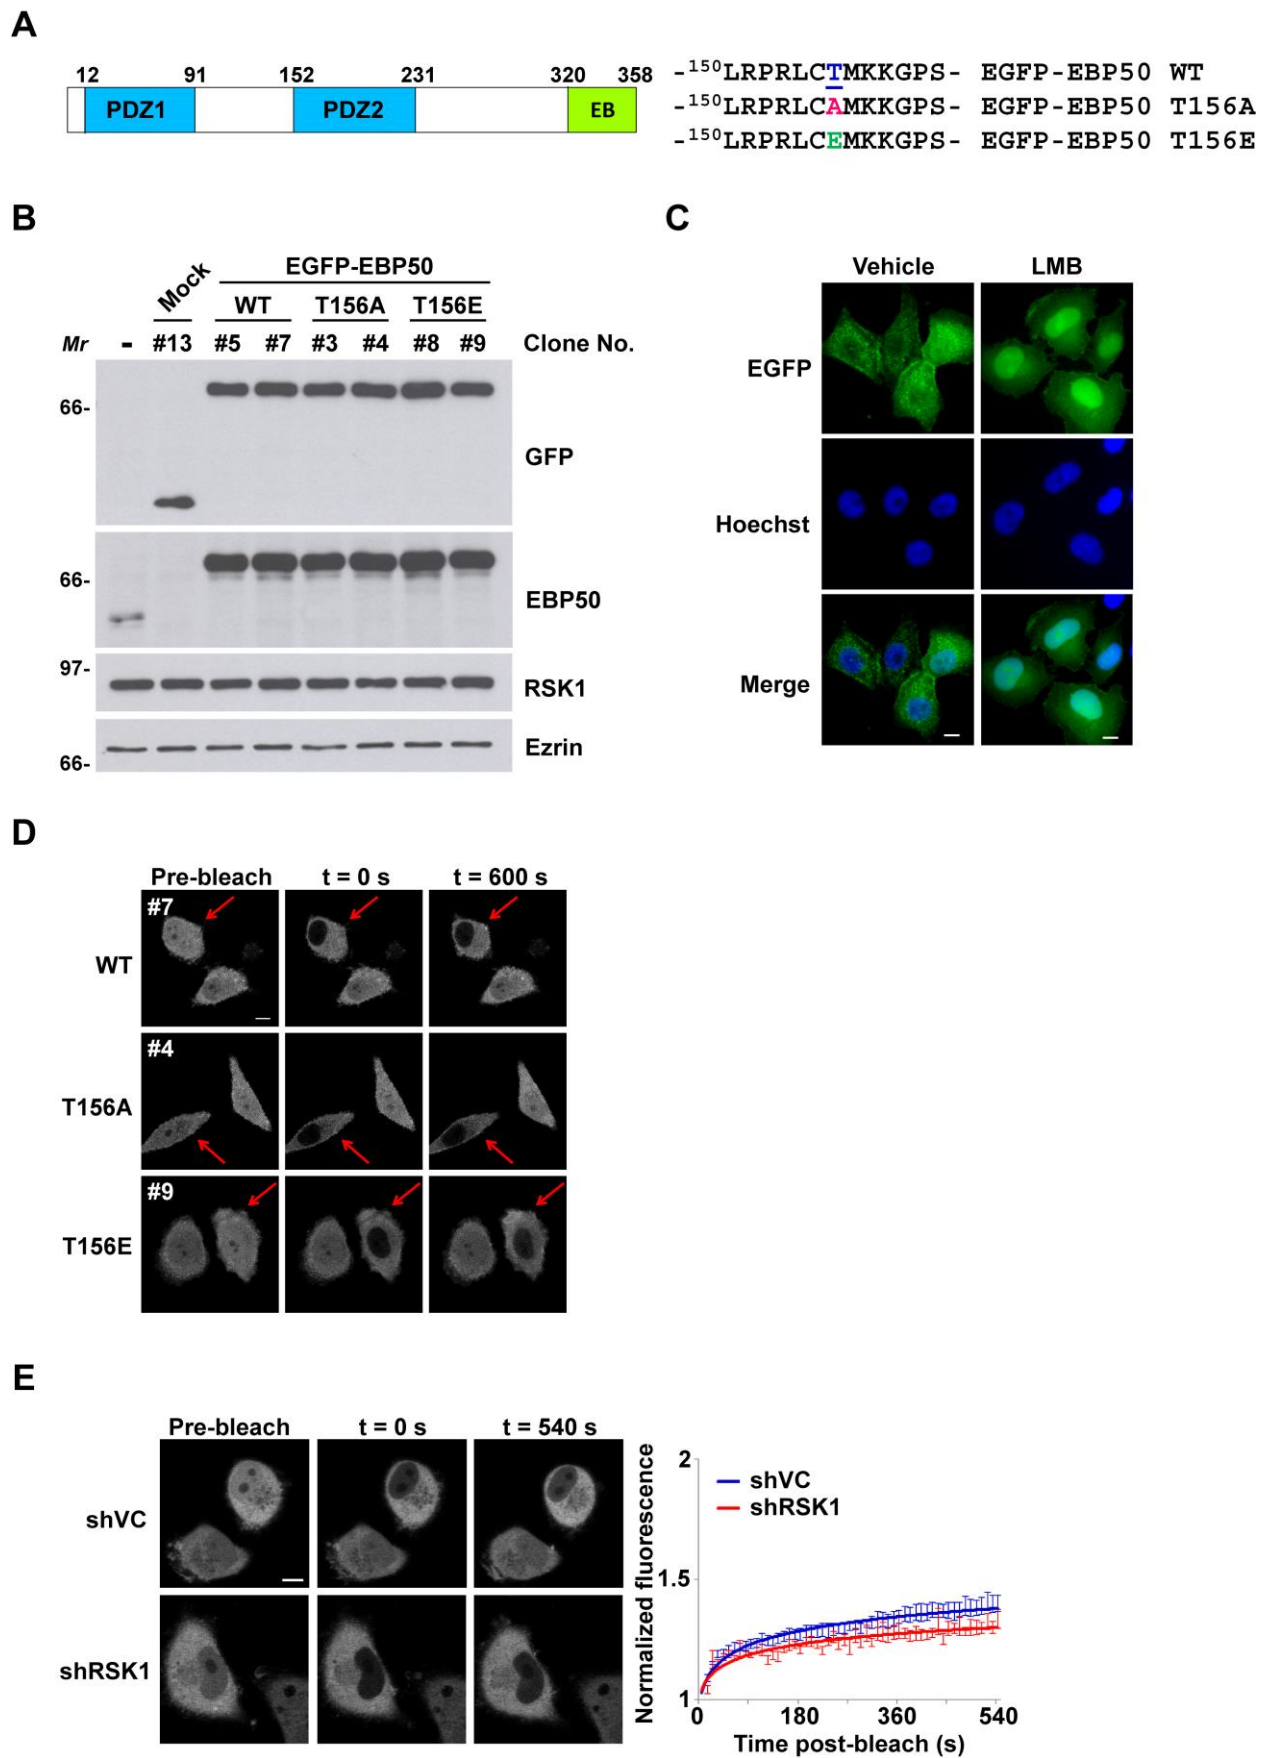

**Figure S4: Phosphorylation of EBP50 at T156 is related to increased nuclear localization.**

(A) Schematic diagram of phospho-mutants of human EBP50 (WT) in which threonine residue

at position 156 within the RXXXXpS/T motif were replaced with either alanine (T156A) or glutamate (T156E) as indicated. **(B)** Western blotting analysis using both GFP and EBP50 antibodies to detect both exogenous and endogenous protein expression levels in HeLa clones stably re-expressing EGFP-tagged wild type EBP50 and its phospho-mutants at T156. Ezrin and RSK1 were examined as the loading controls. Molecular marker (*Mr*): kDa. **(C)** HeLa cells transiently expressing EGFP-EBP50 was serum-starved before being treated with 10 ng/ml of LMB. Scale bar: 10  $\mu$ m. **(D)** Photobleaching nuclear import assay on phospho-mutants of EBP50. Fluorescence images of typical cells from each clone at pre- or post-bleach times and at experimental end points. Scale bar: 10  $\mu$ m. Quantitative data for recovery of fluorescence is shown in Figure 4B. **(E)** Photobleaching nuclear import assays on RSK1-knocked down HeLa cells and mock-transduced cells (shVC) that were co-transfected with HA-RasV12 and EGFP-EBP50. These cells were grown in complete medium with 10% FBS and treated with LMB (10 ng/ml) for an hour before experiments. RasV12-expressing cells were selected based on co-transfection with the EGFP-EBP50 plasmid. Fluorescence images of representative cells from each clone at pre-, post-bleach, and at end points were shown. Quantitative data of the photobleached-cells for recovery of nuclear fluorescence are means  $\pm$  SEM of 10 cells for each time points. Scale bar: 10  $\mu$ m.

**A**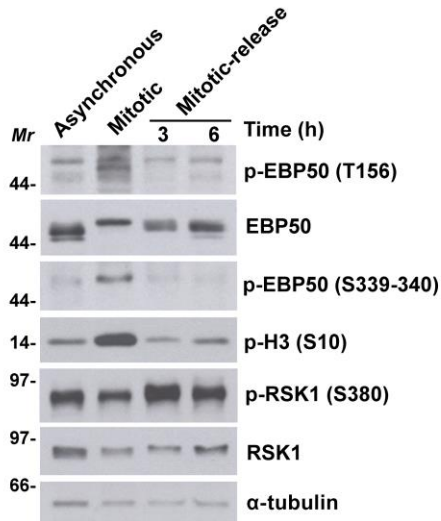**B**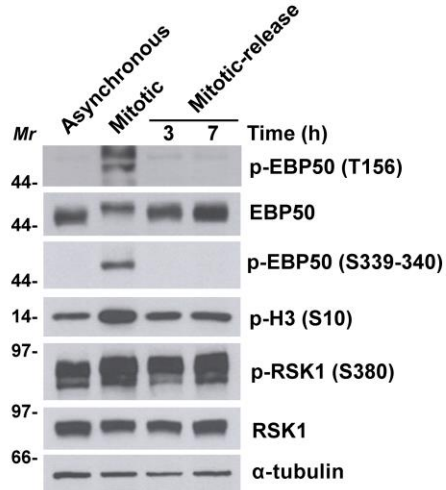**C**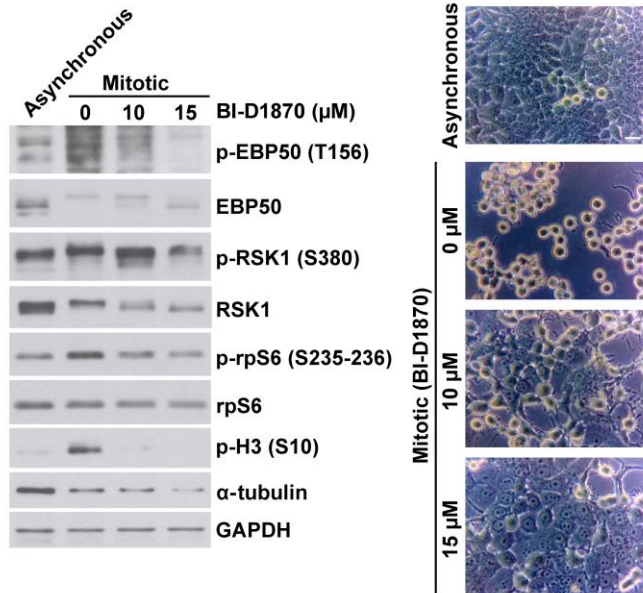**D**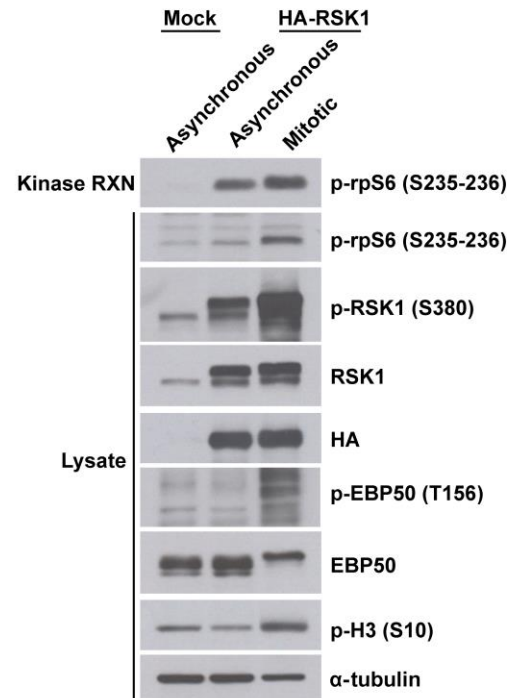**E**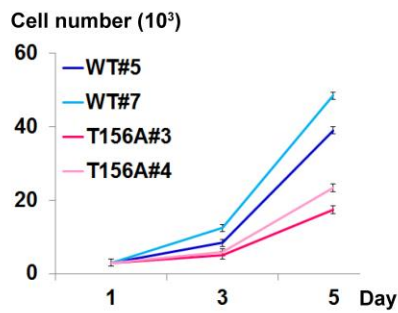**F**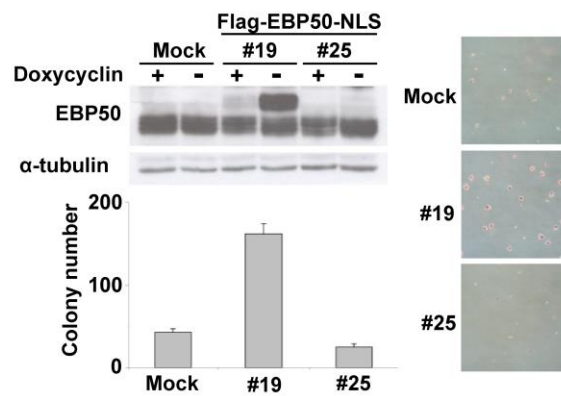

**Figure S5: Cell cycle-dependent phosphorylation of EBP50 is crucial for cell proliferation and transformation.** HeLa cells (A) or SW480 cells (B) were synchronized at mitotic phase using thymidine-nocodazole block (mitotic) and released from the block (mitotic release) for 6h (A) or 7h (B). Phosphorylation of EBP50 was assayed by Western blotting using phospho-T156 and phospho-S339-340 antibodies. Phosphorylation of histone H3 at S10 was used as the mitotic marker. Molecular marker (*Mr*): kDa. (C) HeLa cells synchronized at mitotic phase were treated with BI-D1870 at indicated concentrations. Phosphorylation of EBP50 was assayed by Western blotting using p-EBP50 (T156) antibody. Phosphorylation of RSK1 at S380 and ribosomal protein S6 (rpS6) at S235-236 were assayed to examine activation of RSK1 at mitotic phase. GAPDH or  $\alpha$ -tubulin was examined as a loading control. The morphology of cells at the moment of harvest for the above experiment is shown in photographs. Scale bar: 20  $\mu$ m. (D) HeLa cells transiently expressing HA-RSK1 were synchronized at mitotic phase or left asynchronous. RSK1 was immunoprecipitated from these cells and processed for *in vitro* kinase assay using synthetic peptide of rpS6 (Millipore). Phosphorylation at S235-236 of both synthetic peptide after kinase reaction and endogenous rpS6 in cellular lysates before immunoprecipitation were assessed by Western blotting. (E) Trypan blue exclusion analysis to examine the growth of HeLa cells expressing wild type and T156A mutant of EBP50; each with two independent stable clones. (F) Soft agar assay for MDCK cells stably expressing amino terminally Flag-tagged and carboxyl terminally NLS-fused EBP50 under the tetracycline-repressible system. Western blotting analysis demonstrated one stable clone (#19) expressed a comparable level of NLS-fused EBP50 to endogenous EBP50 when doxycycline was removed. Another stable clone (#25) which failed to express the exogenous protein and a mock transfectant were used as negative controls when all cell lines were cultured in the absence of doxycycline for soft agar assays (photographs and histograms).
