# Supplementary material for: Ras-activated RSK1 phosphorylates EBP50 to regulate its nuclear localization and promote cell proliferation
Source: PubMed Central journal article supplement (PMC4891120; doi:10.18632/oncotarget.7184), 2016-02-03
Supplement: oncotarget-07-10283-s003.pdf [file oncotarget-07-10283-s003.pdf]

**Table S2. The sequence of primers used to generate plasmid constructs used in this study and shRNA targeted sequence for EBP50- or RSK1-knocked down in HeLa cells**

| Plasmid               | Primer ID | Sequence                                 |
|-----------------------|-----------|------------------------------------------|
| pEGFP-EBP50           | BMRC100   | TATGTTCTCGAGAAATGAGCGCGGACGCAGCGG        |
|                       | BMRC142   | GGATCCTCAGAGGTTGCTGAAGAGTTCGT            |
| pEGFP-EBP50T156A      | BMRC100   | TATGTTCTCGAGAAATGAGCGCGGACGCAGCGG        |
|                       | BMRC142   | GGATCCTCAGAGGTTGCTGAAGAGTTCGT            |
|                       | BMRC179   | GGCTCTGTGCCATGAAGAAGGGCCC                |
|                       | BMRC148   | TCTTCATGGCACAGAGCCGAGGCCG                |
| pEGFP-EBP50T156E      | BMRC100   | TATGTTCTCGAGAAATGAGCGCGGACGCAGCGG        |
|                       | BMRC142   | GGATCCTCAGAGGTTGCTGAAGAGTTCGT            |
|                       | BMRC181   | GGCTCTGTGAGATGAAGAAGGGCCC                |
|                       | BMRC150   | TCTTCATCTCACAGAGCCGAGGCCG                |
| shRNA resistant EBP50 | BMRC100   | TATGTTCTCGAGAAATGAGCGCGGACGCAGCGG        |
|                       | BMRC142   | GGATCCTCAGAGGTTGCTGAAGAGTTCGT            |
|                       | BMRC183   | TCGCGAGACCGATGAATTTTTTAAGAAATGCAGAGTGATC |
|                       | BMRC152   | AAAAAATTCATCGGTCTCGCGATCCACCACCAGCAGCTTG |
| shRNA resistant T156A | BMRC100   | TATGTTCTCGAGAAATGAGCGCGGACGCAGCGG        |
|                       | BMRC142   | GGATCCTCAGAGGTTGCTGAAGAGTTCGT            |
|                       | BMRC179   | GGCTCTGTGCCATGAAGAAGGGCCC                |
|                       | BMRC148   | TCTTCATGGCACAGAGCCGAGGCCG                |
|                       | BMRC183   | TCGCGAGACCGATGAATTTTTTAAGAAATGCAGAGTGATC |
| shRNA resistant T156E | BMRC100   | TATGTTCTCGAGAAATGAGCGCGGACGCAGCGG        |
|                       | BMRC142   | GGATCCTCAGAGGTTGCTGAAGAGTTCGT            |
|                       | BMRC181   | GGCTCTGTGAGATGAAGAAGGGCCC                |
|                       | BMRC150   | TCTTCATCTCACAGAGCCGAGGCCG                |
|                       | BMRC183   | TCGCGAGACCGATGAATTTTTTAAGAAATGCAGAGTGATC |
|                       | BMRC152   | AAAAAATTCATCGGTCTCGCGATCCACCACCAGCAGCTTG |

  

| Gene Symbol      | Accession No. | shRNA Target Sequence            |
|------------------|---------------|----------------------------------|
| SLC9A3R1 (EBP50) | NM_004252     | CAGGGAAACTGACGAGTTCTT            |
| RPS6KA1 (RSK1)   | NM_002953     | GCTCTATCTCATTCTGGACTT (shRSK1#2) |
|                  |               | GACCATGACACTGATTCTGAA (shRSK1#5) |
